# Supplementary material for: Animal Protein versus Plant Protein in Supporting Lean Mass and Muscle Strength: A Systematic Review and Meta-Analysis of Randomized Controlled Trials
Source: MDPI journal article supplement (doi:10.3390/nu13020661), 2021-02-18
Supplement: s1 [file s1]

**Table S1.** Search strategy for a systematic review and meta-analysis assessing the effects of animal protein versus plant protein on supporting muscle mass and strength in adults.

| Database                   | Query                                                                                                                                                                                                                                                                                                                                                                                                                                                                                                                                                                                                                                                                                                                                                                                                                                                                                                                                                                                                                                                                                                                                                                                                                        | Search Results |
|----------------------------|------------------------------------------------------------------------------------------------------------------------------------------------------------------------------------------------------------------------------------------------------------------------------------------------------------------------------------------------------------------------------------------------------------------------------------------------------------------------------------------------------------------------------------------------------------------------------------------------------------------------------------------------------------------------------------------------------------------------------------------------------------------------------------------------------------------------------------------------------------------------------------------------------------------------------------------------------------------------------------------------------------------------------------------------------------------------------------------------------------------------------------------------------------------------------------------------------------------------------|----------------|
| PubMed                     | <p>(((((protein[Title/Abstract]) OR proteins[Title/Abstract])) AND (((((((((((meat proteins[MeSH Terms]) OR milk proteins[MeSH Terms]) OR egg proteins, dietary[MeSH Terms]) OR meat[Title/Abstract]) OR meats[Title/Abstract]) OR poultry[Title/Abstract]) OR fish[Title/Abstract]) OR fishes[Title/Abstract]) OR egg[Title/Abstract]) OR eggs[Title/Abstract]) OR milk[Title/Abstract]) OR dairy[Title/Abstract]) OR whey[Title/Abstract]) OR casein[Title/Abstract])) AND (((((((((((plant proteins, dietary[MeSH Terms]) OR plant[Title/Abstract]) OR plants[Title/Abstract]) OR legume[Title/Abstract]) OR legumes[Title/Abstract]) OR soy[Title/Abstract]) OR pea[Title/Abstract]) OR peas[Title/Abstract]) OR bean[Title/Abstract]) OR beans[Title/Abstract])) AND (((((((((((muscle, skeletal[MeSH Terms]) OR muscle strength[MeSH Terms]) OR body composition[MeSH Terms]) OR muscle[Title/Abstract]) OR “muscle mass”[Title/Abstract]) OR “lean mass”[Title/Abstract]) OR “lean body mass”[Title/Abstract]) OR “fat-free mass”[Title/Abstract]) OR “fat-free body mass”[Title/Abstract]) OR “body composition”[Title/Abstract]) OR “muscle strength”[Title/Abstract]) OR “muscular strength”[Title/Abstract]))</p> | 509            |
| Embase                     | <p>(protein:ab,ti OR proteins:ab,ti) AND (‘animal protein’/exp OR ‘egg protein’/exp OR ‘milk protein’/exp OR meat:ab,ti OR meats:ab,ti OR poultry:ab,ti OR fish:ab,ti OR fishes:ab,ti OR egg:ab,ti OR eggs:ab,ti OR dairy:ab,ti OR milk:ab,ti OR whey:ab,ti OR casein:ab,ti) AND (‘plant protein’/exp OR plant:ab,ti OR plants:ab,ti OR soy:ab,ti OR legume:ab,ti OR legumes:ab,ti OR pea:ab,ti OR peas:ab,ti OR bean:ab,ti OR beans:ab,ti) AND (‘muscle mass’/exp OR ‘muscle strength’/exp OR ‘body composition’/exp OR ‘body composition’:ab,ti OR muscle:ab,ti OR ‘muscle mass’:ab,ti OR ‘lean mass’:ab,ti OR ‘lean body mass’:ab,ti OR ‘fat-free mass’:ab,ti OR ‘fat-free body mass’:ab,ti OR ‘muscle strength’:ab,ti OR ‘muscular strength’:ab,ti)</p>                                                                                                                                                                                                                                                                                                                                                                                                                                                                  | 694            |
| Scopus                     | <p>(TITLE-ABS-KEY (protein OR proteins) AND TITLE-ABS-KEY (meat OR meats OR poultry OR fish OR fishes OR egg OR eggs OR dairy OR milk OR whey OR casein) AND TITLE-ABS-KEY (plant OR plants OR soy OR legume OR legumes OR pea OR peas OR bean OR beans) AND TITLE-ABS-KEY (“body composition” OR muscle OR “muscle mass” OR “lean mass” OR “lean body mass” OR “fat-free mass” OR “fat-free body mass” OR “muscle strength” OR “muscular strength”))</p>                                                                                                                                                                                                                                                                                                                                                                                                                                                                                                                                                                                                                                                                                                                                                                    | 1659           |
| CINAHL Plus with Full Text | <p>protein OR proteins AND (MH “Milk Proteins+”) OR (meat OR meats OR poultry OR fish OR fishes OR egg OR eggs OR dairy OR milk OR whey OR casein) AND (MH “Vegetable Proteins+”) OR (plant OR plants OR soy OR legume OR legumes OR pea OR peas OR bean OR beans) AND ((MH “Muscle, Skeletal+”) OR (MH “Muscle Strength+”) OR (MH “Body Composition+”)) OR (“body composition” OR muscle OR “muscle mass” OR “lean mass” OR “lean body mass” OR “fat-free mass” OR “fat-free body mass” OR “muscle strength” OR “muscular strength”)</p>                                                                                                                                                                                                                                                                                                                                                                                                                                                                                                                                                                                                                                                                                    | 219            |
| <b>TOTAL</b>               |                                                                                                                                                                                                                                                                                                                                                                                                                                                                                                                                                                                                                                                                                                                                                                                                                                                                                                                                                                                                                                                                                                                                                                                                                              | <b>3081</b>    |

**Table S2.** Risk of bias assessment of included studies.

| Author                   | Selection Bias             |                        | Performance Bias                          | Detection Bias                |
|--------------------------|----------------------------|------------------------|-------------------------------------------|-------------------------------|
|                          | Random Sequence Generation | Allocation Concealment | Blinding of Participants and Investigator | Blinding of Outcome Assessors |
| Banaszek et al. [32]     | Unclear                    | Unclear                | Unclear                                   | Unclear                       |
| Basciani et al. [33]     | Low risk                   | Unclear                | Unclear                                   | Unclear                       |
| Candow et al. [34]       | Unclear                    | Low risk               | Low risk                                  | Unclear                       |
| DeNysschen et al. [35]   | Unclear                    | Unclear                | Low risk                                  | Unclear                       |
| Hartman et al. [36]      | Unclear                    | Unclear                | Unclear                                   | Unclear                       |
| Haub et al. [37]         | Unclear                    | Unclear                | Unclear                                   | Unclear                       |
| Hill et al. [38]         | Low risk                   | Unclear                | Low risk                                  | Low risk                      |
| Joy et al. [39]          | Unclear                    | Unclear                | Unclear                                   | Unclear                       |
| Kjølbæk et al. [40]      | Low risk                   | Low risk               | Low risk                                  | Low risk                      |
| Lynch et al. [41]        | Unclear                    | Unclear                | Unclear                                   | Low risk                      |
| Maltais et al. [42]      | Unclear                    | Low risk               | Low risk                                  | Unclear                       |
| Mobley et al. [43]       | Low risk                   | Low risk               | Low risk                                  | Low risk                      |
| Moeller et al. [44]      | Unclear                    | Unclear                | Unclear                                   | Unclear                       |
| Neacsu et al. [45]       | Unclear                    | Unclear                | Unclear                                   | Unclear                       |
| Thomson et al. [46]      | Unclear                    | Unclear                | Unclear                                   | Low risk                      |
| Tomayko et al. [47]      | Unclear                    | Low risk               | Low risk                                  | Low risk                      |
| Volek et al. [48]        | Unclear                    | Low risk               | Unclear                                   | Unclear                       |
| Vupadhyayula et al. [49] | Low risk                   | Low risk               | Low risk                                  | Unclear                       |

**Table S3.** Sensitivity analysis for lean mass outcomes following the removal of single groups or randomized controlled trials to assess the robustness of meta-analyses results.

| Group Excluded                  | Mean difference | [95% CI]        | I <sup>2</sup> (%) | X <sup>2</sup> | P for $\chi^2$ |
|---------------------------------|-----------------|-----------------|--------------------|----------------|----------------|
| <b><u>Lean Mass (kg)</u></b>    |                 |                 |                    |                |                |
| None                            | 0.215           | [-0.024, 0.455] | 36.1               | 29.71          | 0.056          |
| Basciani et al. (I) [33]        | 0.226           | [-0.019, 0.471] | 38.5               | 29.26          | 0.045          |
| Basciani et al. (II) [33]       | 0.198           | [-0.038, 0.435] | 35.2               | 27.76          | 0.066          |
| Basciani et al. (I and II) [33] | 0.208           | [-0.034, 0.450] | 37.8               | 27.31          | 0.054          |
| Hartman et al. [36]             | 0.174           | [-0.063, 0.411] | 32.8               | 26.80          | 0.083          |
| Haub et al. [37]                | 0.202           | [-0.045, 0.449] | 38.4               | 29.24          | 0.046          |
| Hill et al. (I) [38]            | 0.223           | [-0.025, 0.471] | 39.1               | 29.58          | 0.042          |
| Hill et al. (II) [38]           | 0.212           | [-0.036, 0.461] | 39.3               | 29.66          | 0.041          |
| Hill et al. (I and II) [38]     | 0.220           | [-0.037, 0.477] | 42.4               | 29.53          | 0.030          |
| Joy et al. [39]                 | 0.199           | [-0.049, 0.446] | 38.1               | 29.10          | 0.047          |
| Kjølbæk et al. (I) [40]         | 0.212           | [-0.046, 0.471] | 39.4               | 29.69          | 0.041          |
| Kjølbæk et al. (II) [40]        | 0.206           | [-0.055, 0.466] | 39.1               | 29.57          | 0.042          |
| Kjølbæk et al. (I and II) [40]  | 0.202           | [-0.080, 0.484] | 42.5               | 29.54          | 0.030          |
| Lynch et al. [41]               | 0.213           | [-0.078, 0.504] | 37.2               | 28.65          | 0.053          |
| Mobley et al. (I) [43]          | 0.236           | [-0.001, 0.474] | 35.0               | 27.67          | 0.067          |
| Mobley et al. (II) [43]         | 0.235           | [-0.002, 0.472] | 34.8               | 27.63          | 0.068          |
| Mobley et al. (I and II) [43]   | 0.254           | [0.020, 0.488]  | 33.5               | 25.56          | 0.083          |
| Moeller et al. (I) [44]         | 0.236           | [-0.022, 0.493] | 38.3               | 29.19          | 0.046          |
| Moeller et al. (II) [44]        | 0.267           | [0.029, 0.505]  | 29.4               | 25.51          | 0.111          |
| Moeller et al. (I and II) [44]  | 0.293           | [0.038, 0.549]  | 31.6               | 24.84          | 0.098          |
| Neacsu et al. [45]              | 0.232           | [-0.024, 0.487] | 38.7               | 29.37          | 0.044          |
| Thomson et al. [46]             | 0.273           | [0.040, 0.507]  | 26.7               | 24.54          | 0.138          |
| Tomayko et al. [47]             | 0.203           | [-0.033, 0.439] | 35.4               | 27.85          | 0.064          |

|                                     |       |                 |      |       |       |
|-------------------------------------|-------|-----------------|------|-------|-------|
| Volek et al. [48]                   | 0.154 | [-0.057, 0.364] | 20.6 | 22.68 | 0.203 |
| Vupadhyayula et al. (I) [49]        | 0.219 | [-0.029, 0.467] | 39.4 | 29.69 | 0.041 |
| Vupadhyayula et al. (II) [49]       | 0.217 | [-0.042, 0.476] | 39.4 | 29.71 | 0.040 |
| Vupadhyayula et al. (I and II) [49] | 0.221 | [-0.047, 0.490] | 42.7 | 29.69 | 0.029 |
| <b>Percent lean mass (%)</b>        |       |                 |      |       |       |
| None                                | 0.502 | [0.053, 0.951]  | 0.0  | 2.78  | 0.986 |
| Basciani et al. (I) [33]            | 0.539 | [0.080, 0.998]  | 0.0  | 2.19  | 0.988 |
| Basciani et al. (II) [33]           | 0.497 | [0.038, 0.956]  | 0.0  | 2.77  | 0.973 |
| Basciani et al. (I and II) [33]     | 0.536 | [0.066, 1.006]  | 0.0  | 2.18  | 0.975 |
| Hill et al. (I) [38]                | 0.499 | [0.022, 0.977]  | 0.0  | 2.78  | 0.972 |
| Hill et al. (II) [38]               | 0.508 | [0.032, 0.985]  | 0.0  | 2.78  | 0.972 |
| Hill et al. (I and II) [38]         | 0.507 | [-0.005, 1.018] | 0.0  | 2.78  | 0.948 |
| Kjølbaek et al. (I) [40]            | 0.557 | [0.087, 1.026]  | 0.0  | 2.18  | 0.988 |
| Kjølbaek et al. (II) [40]           | 0.522 | [0.049, 0.996]  | 0.0  | 2.71  | 0.975 |
| Kjølbaek et al. (I and II) [40]     | 0.586 | [0.088, 1.084]  | 0.0  | 2.05  | 0.979 |
| Lynch et al. [41]                   | 0.465 | [-0.024, 0.954] | 0.0  | 2.65  | 0.977 |
| Mobley et al. (I) [43]              | 0.411 | [-0.066, 0.888] | 0.0  | 1.56  | 0.997 |
| Mobley et al. (II) [43]             | 0.543 | [0.065, 1.021]  | 0.0  | 2.54  | 0.980 |
| Mobley et al. (I and II) [43]       | 0.445 | [-0.067, 0.956] | 0.0  | 1.43  | 0.994 |
| Vupadhyayula et al. (I) [49]        | 0.488 | [0.030, 0.945]  | 0.0  | 2.68  | 0.976 |
| Vupadhyayula et al. (II) [49]       | 0.485 | [0.019, 0.952]  | 0.0  | 2.72  | 0.974 |
| Vupadhyayula et al. (I and II) [49] | 0.470 | [-0.006, 0.945] | 0.0  | 2.61  | 0.956 |

**Table S4.** Sensitivity analysis for strength outcomes following the removal of single groups or randomized controlled trials to assess the robustness of meta-analyses results.

| Group excluded                      | Mean difference | [95% CI]          | I <sup>2</sup> (%) | χ <sup>2</sup> | P for χ <sup>2</sup> |
|-------------------------------------|-----------------|-------------------|--------------------|----------------|----------------------|
| <b>1-RM squat (kg)</b>              |                 |                   |                    |                |                      |
| None                                | -0.938          | [-4.571, 2.696]   | 0.0                | 0.81           | 0.667                |
| Banaszek et al. [32]                | -0.533          | [-4.937, 3.871]   | 0.0                | 0.71           | 0.400                |
| DeNysschen et al. [35]              | -2.523          | [-7.791, 2.746]   | 0.0                | 0.15           | 0.710                |
| Volek et al. [48]                   | -0.371          | [-4.326, 3.585]   | 0.0                | 0.31           | 0.580                |
| <b>Grip strength (kg)</b>           |                 |                   |                    |                |                      |
| None                                | -0.493          | [-1.282, 0.296]   | 0.0                | 2.24           | 0.692                |
| Basciani et al. (I) [33]            | -0.649          | [-1.476, 0.178]   | 0.0                | 0.71           | 0.871                |
| Basciani et al. (II) [33]           | -0.570          | [-1.389, 0.249]   | 0.0                | 1.76           | 0.623                |
| Basciani et al. (I and II) [33]     | -0.747          | [-1.608, 0.115]   | 0.0                | 0.07           | 0.966                |
| Thomson et al. [46]                 | -0.458          | [-1.368, 0.452]   | 0.0                | 2.21           | 0.529                |
| Vupadhyayula et al. (I) [49]        | -0.332          | [-1.268, 0.604]   | 0.0                | 1.84           | 0.606                |
| Vupadhyayula et al. (II) [49]       | -0.389          | [-1.336, 0.557]   | 0.0                | 2.09           | 0.555                |
| Vupadhyayula et al. (I and II) [49] | -0.035          | [-1.272, 1.202]   | 0.0                | 1.32           | 0.516                |
| <b>Leg/knee extension (Nm)</b>      |                 |                   |                    |                |                      |
| None                                | -3.012          | [-19.253, 13.229] | 85.8               | 21.12          | 0.000                |
| Haub et al. [37]                    | 4.720           | [-8.320, 17.760]  | 62.1               | 5.28           | 0.072                |
| Lynch et al. [41]                   | -9.000          | [-28.443, 10.443] | 83.5               | 12.10          | 0.002                |

|                     |        |                   |      |       |       |
|---------------------|--------|-------------------|------|-------|-------|
| Thomson et al. [46] | -7.698 | [-30.935, 15.539] | 88.9 | 18.07 | 0.000 |
| Tomayko et al. [47] | 0.952  | [-16.399, 18.304] | 89.2 | 18.46 | 0.000 |

### Leg/knee flexion (Nm)

|                     |       |                 |     |      |       |
|---------------------|-------|-----------------|-----|------|-------|
| None                | 2.926 | [-1.705, 7.557] | 0.0 | 0.53 | 0.768 |
| Haub et al. [37]    | 3.418 | [-1.771, 8.606] | 0.0 | 0.36 | 0.549 |
| Lynch et al. [41]   | 0.396 | [-8.087, 8.880] | 0.0 | 0.04 | 0.838 |
| Tomayko et al. [47] | 3.326 | [-1.541, 8.193] | 0.0 | 0.25 | 0.614 |

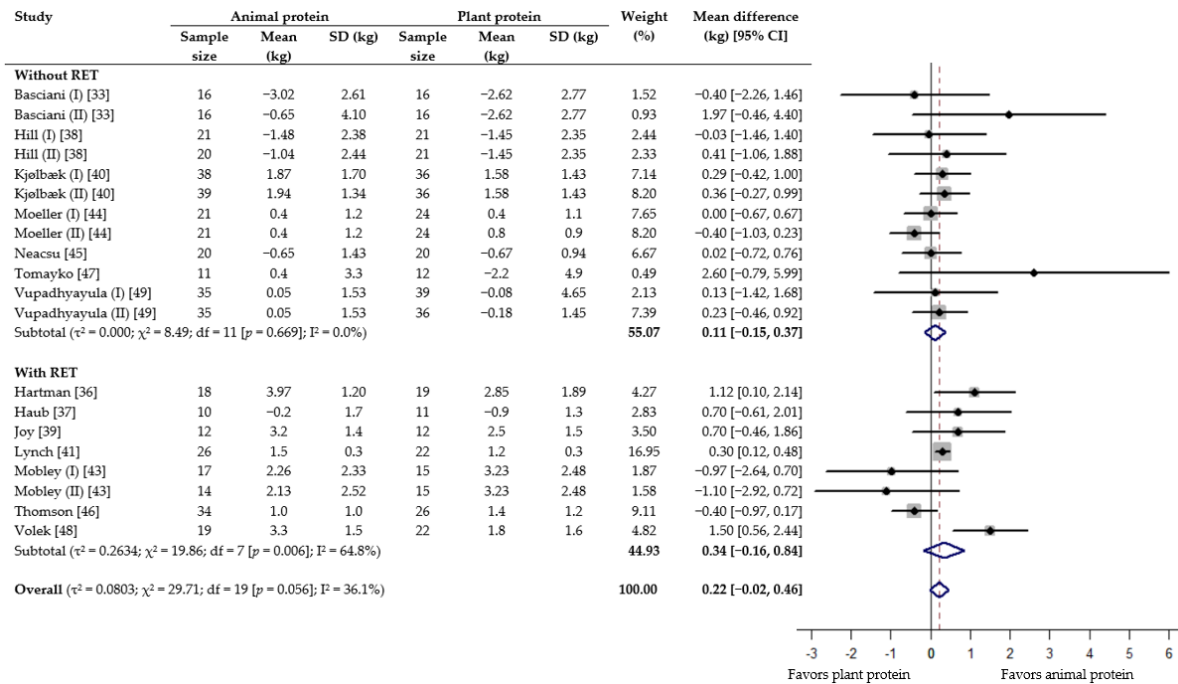

**Figure S1.** Effect of consuming animal protein compared to plant protein on changes in absolute lean mass (kg), with and without resistance exercise training (RET). Data expressed as weighted mean differences with 95% CIs, using a random-effects model.

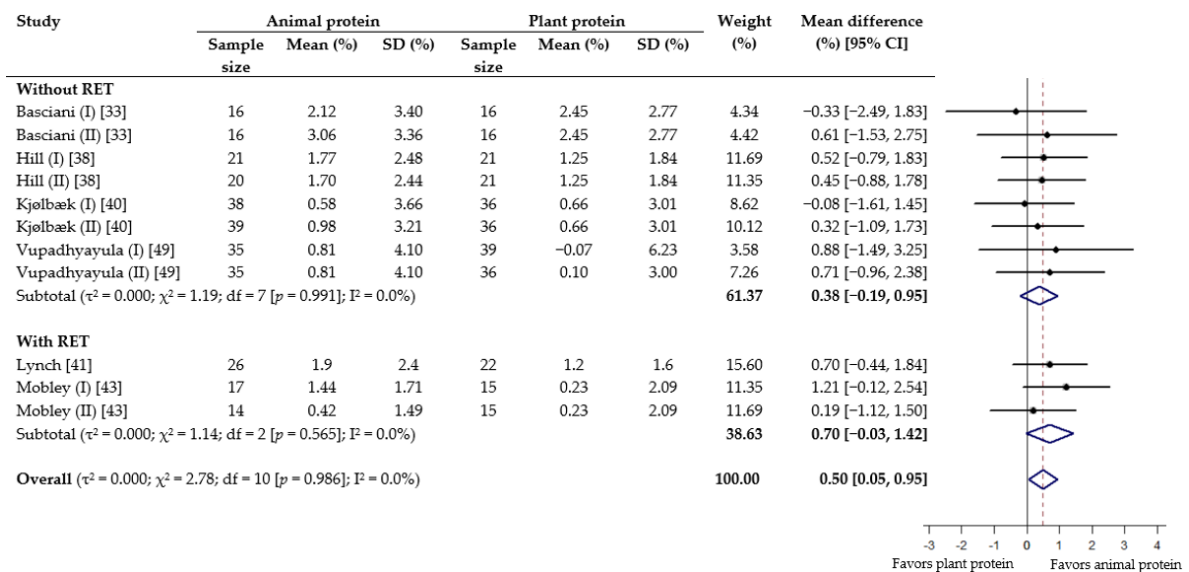

**Figure S2.** Effect of consuming animal protein compared to plant protein on changes in percent lean mass (%), with and without resistance exercise training (RET). Data expressed as weighted mean differences with 95% CIs, using a random-effects model.

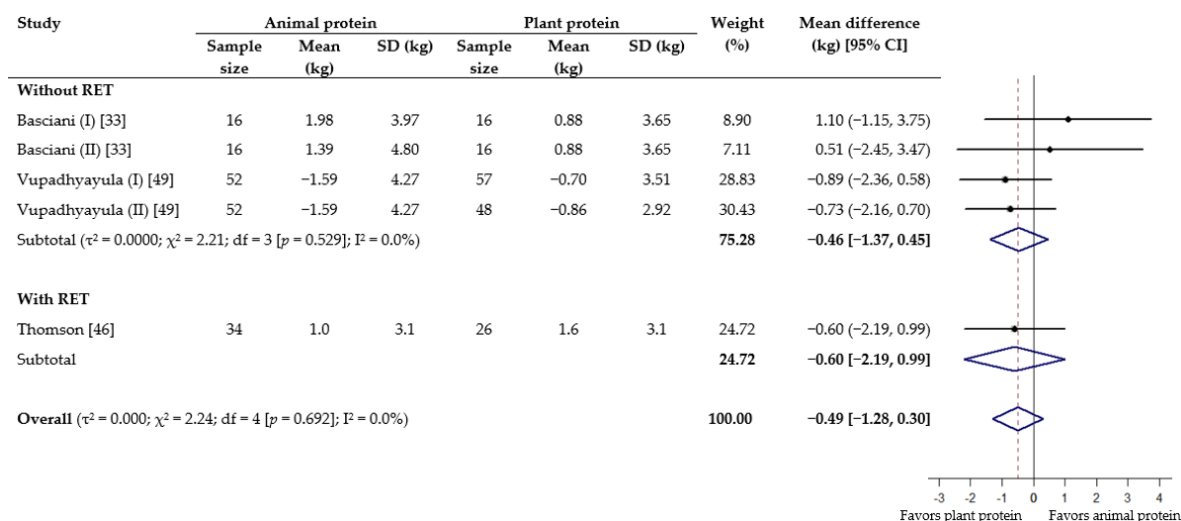

**Figure S3.** Effect of consuming animal protein compared to plant protein on changes in grip strength (kg), with and without resistance exercise training (RET). Data expressed as weighted mean differences with 95% CIs, using a random-effects model.

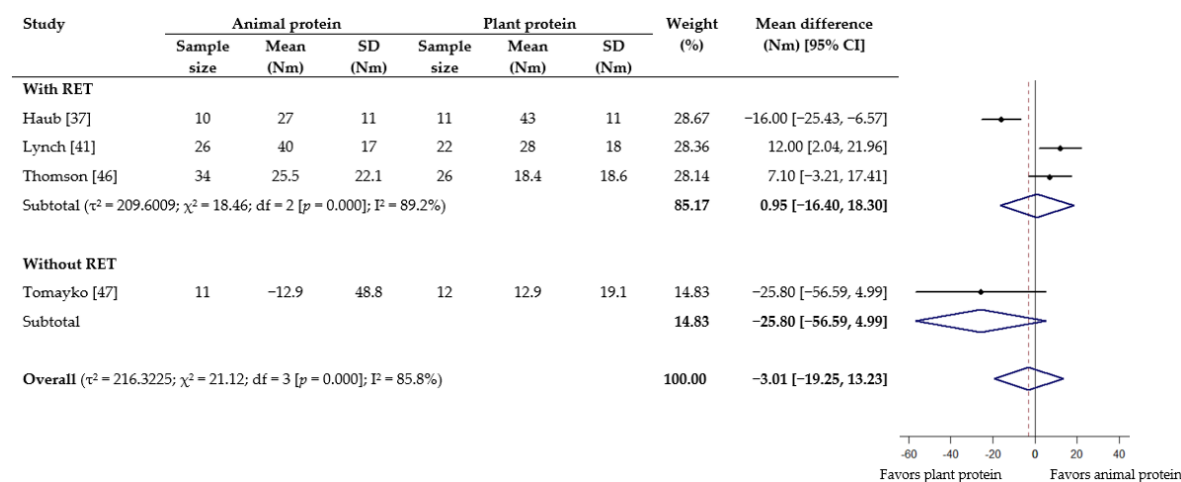

**Figure S4.** Effect of consuming animal protein compared to plant protein on changes in peak torque of leg/knee extension (Nm), with and without resistance exercise training (RET). Data expressed as weighted mean differences with 95% CIs, using a random-effects model. Nm: newton meter.

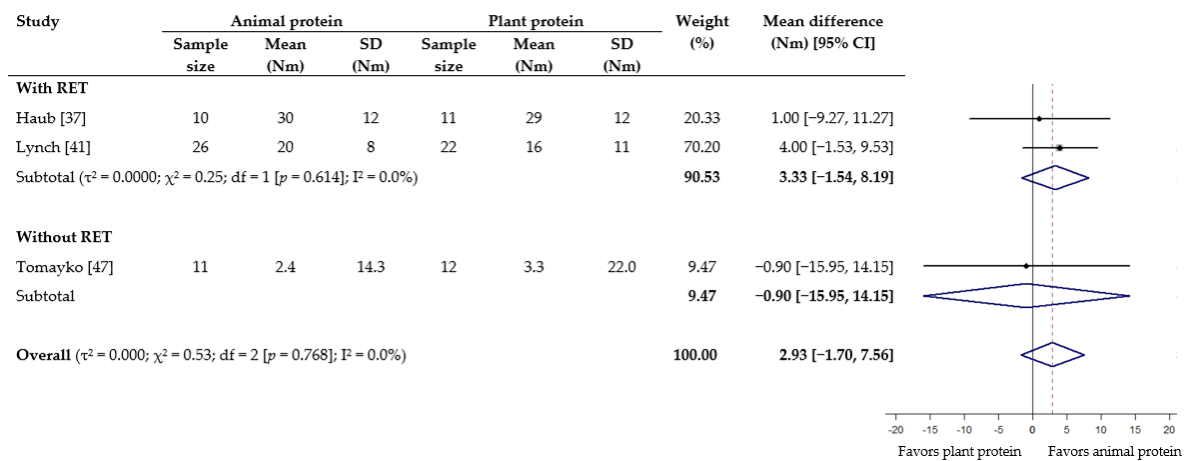

**Figure S5.** Effect of consuming animal protein compared to plant protein on changes in peak torque of leg/knee flexion (Nm), with and without resistance exercise training (RET). Data expressed as weighted mean differences with 95% CIs, using a random-effects model. Nm: newton meter.
